# Supplementary material for: Antisense Therapy for a Common Corneal Dystrophy Ameliorates TCF4 Repeat Expansion-Mediated Toxicity
Source: PubMed Central journal article supplement (PMC5985359; doi:10.1016/j.ajhg.2018.02.010), 2018-03-08
Supplement: mmc1.pdf [file mmc1.pdf]

**Supplemental Data**

**Antisense Therapy for a Common Corneal Dystrophy**

**Ameliorates *TCF4* Repeat Expansion-Mediated Toxicity**

**Christina Zarouchlioti, Beatriz Sanchez-Pintado, Nathaniel J. Hafford Tear, Pontus Klein, Petra Liskova, Kalyan Dulla, Ma'ayan Semo, Anthony A. Vugler, Kirithika Muthusamy, Lubica Dudakova, Hannah J. Levis, Pavlina Skalicka, Pirro Hysi, Michael E. Cheetham, Stephen J. Tuft, Peter Adamson, Alison J. Hardcastle, and Alice E. Davidson**

## Supplemental Data

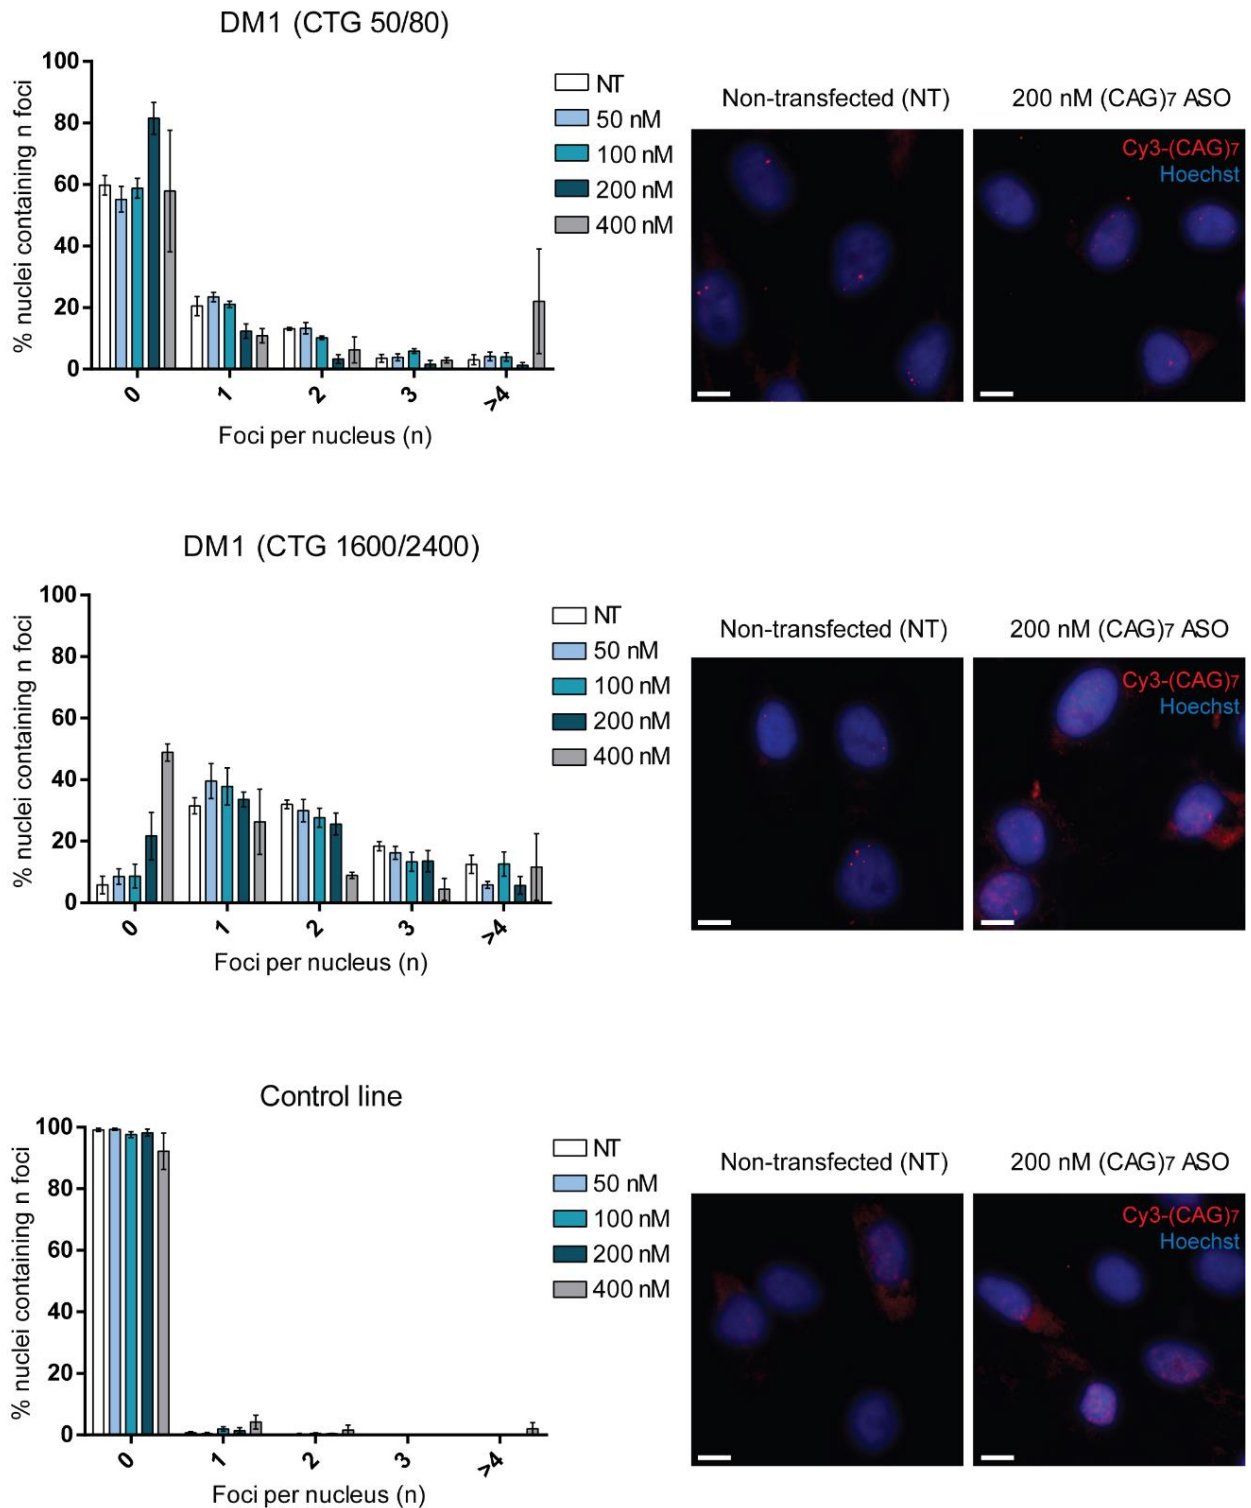

### Figure S1. Optimization of antisense oligo (ASO) concentration used for *in vitro* transfections.

Fibroblasts isolated from myotonic dystrophy type 1 (DM1) subjects harboring 50/80 CTG repeats, 1600/2400 CTG repeats, and control fibroblasts noted GM03991, GM04602, and GM04603 respectively (Coriell Institute) were transfected with 2'Ome-PS-(CAG)<sub>7</sub> ASO at indicated concentrations using Turbofect (ThermoFisher Scientific). Twenty-four hours post transfection fluorescence *in situ* hybridization (FISH) was performed and RNA foci were quantified using CellProfiler (Broad Institute). A concentration of 200 nM 2'Ome-PS-(CAG)<sub>7</sub> ASO was selected to be optimal, on the basis for these data, for future ASO transfection experiments in corneal endothelial cells (CECs). Scale bars, 10 μm.

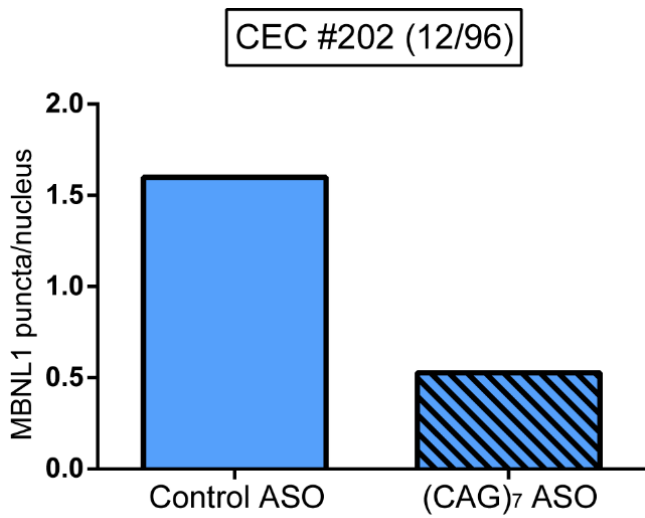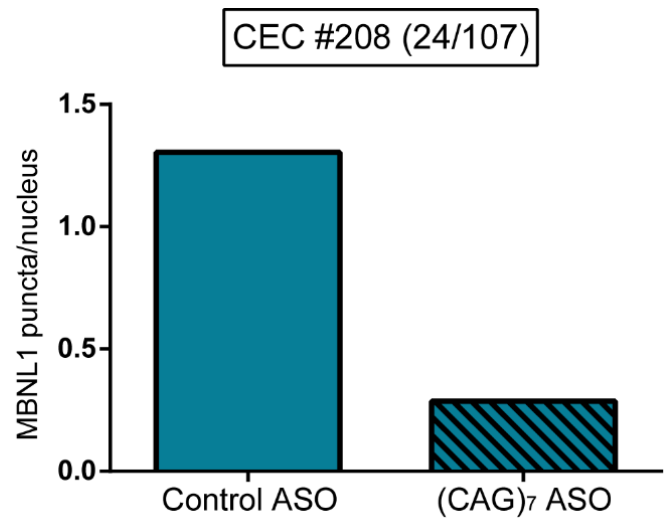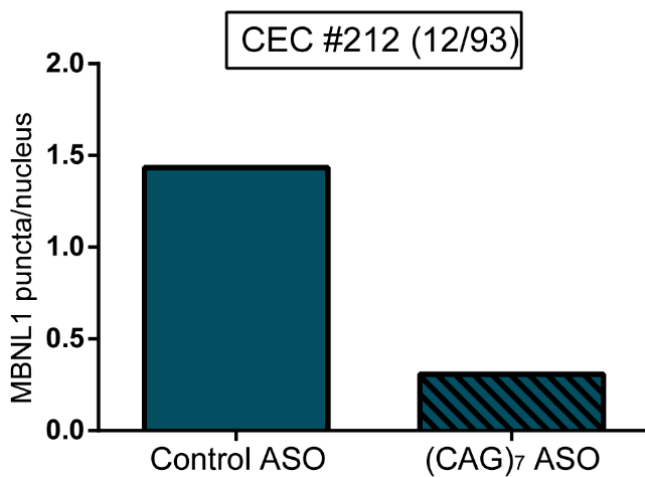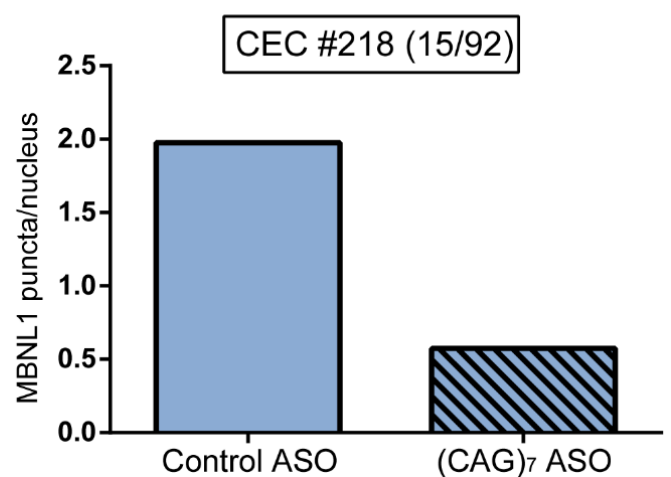

**Figure S2. Quantification of nuclear MBNL1-positive puncta post antisense oligo (ASO) treatments.** The result of 4 independent Fuchs endothelial corneal dystrophy (FECD) case-derived CEC lines, where the numbers of MBNL1 puncta were quantified after treatment with the control and (CAG)<sub>7</sub> ASOs. CTG18.1 genotypes are shown in parentheses for each line investigated.

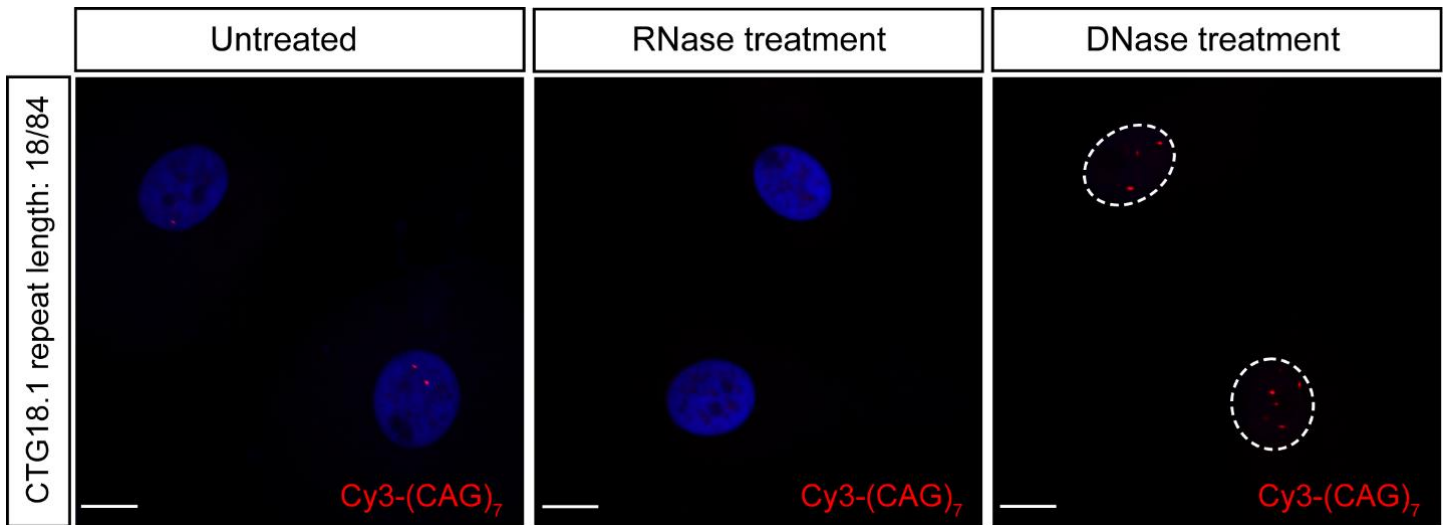

**Figure S3. Fluorescence *in situ* hybridization (FISH) protocol detects RNA-specific CUG foci.** Sense RNA foci detection with Cy3-(CAG)<sub>7</sub> probe in untreated, RNase treated and DNase treated FECD case-derived CECs with an expanded *TCF4* CTG18.1 allele (18/84). Scale bars, 10  $\mu$ m.

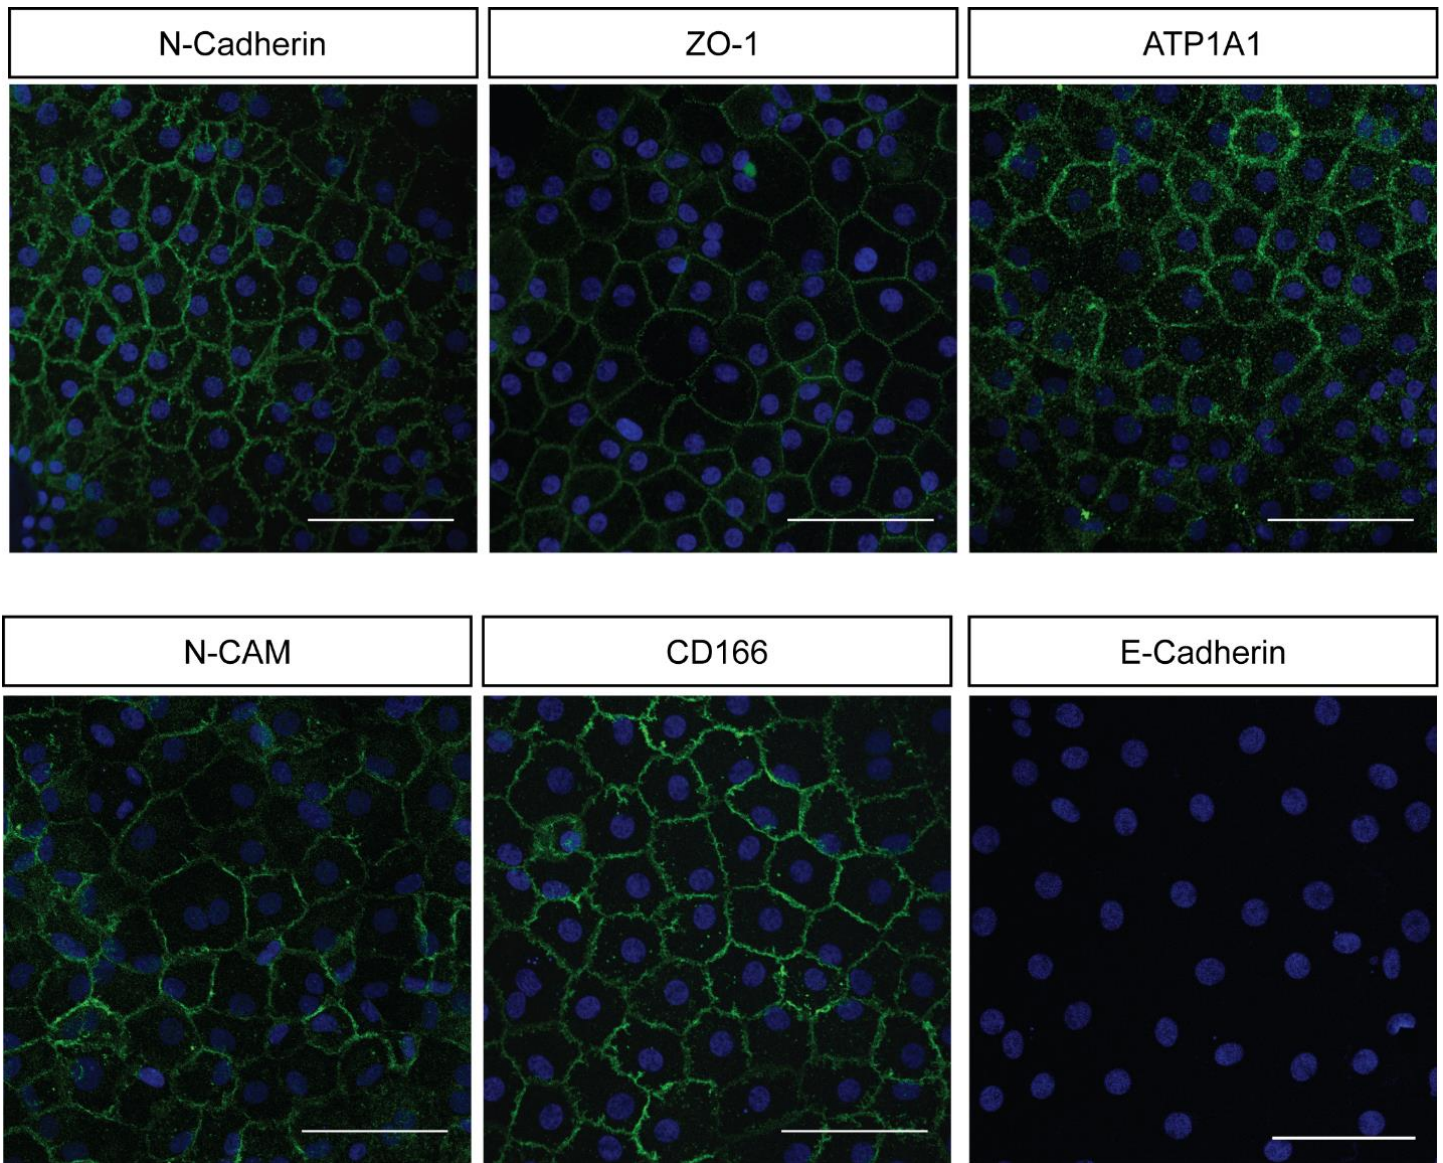

**Figure S4. Primary corneal endothelial cell (CEC) cultures display distinctive corneal endothelial polygonal morphology and display markers indicative of endothelial cell status.** Endothelial markers N-Cadherin, ZO-1, ATP1A1, N-CAM and CD166 were observed and the epithelial marker E-Cadherin was absent in CEC lines derived from healthy tissue. Scale bars, 100 μm.

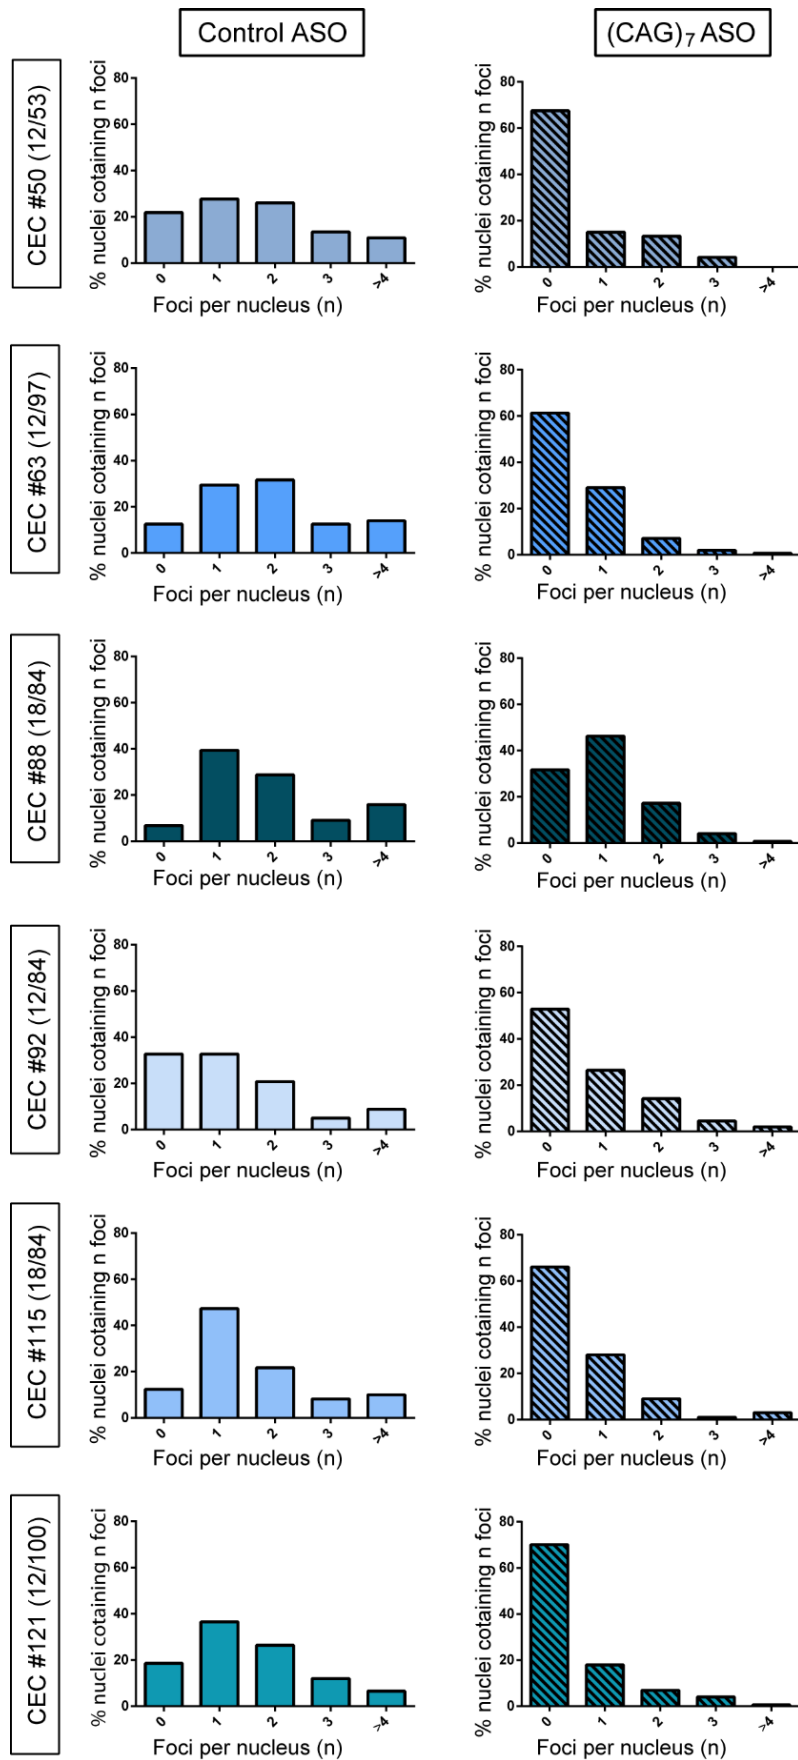

**Figure S5. Antisense oligo (ASO)-mediated treatment of 6 independent FECD case-derived corneal endothelial cell (CEC) lines.** The effect of the (CAG)<sub>7</sub> ASO treatment on foci incidence in each of the 6 independent FECD case-derived cell lines investigated is shown. CTG18.1 genotypes are shown in parentheses for each line investigated.

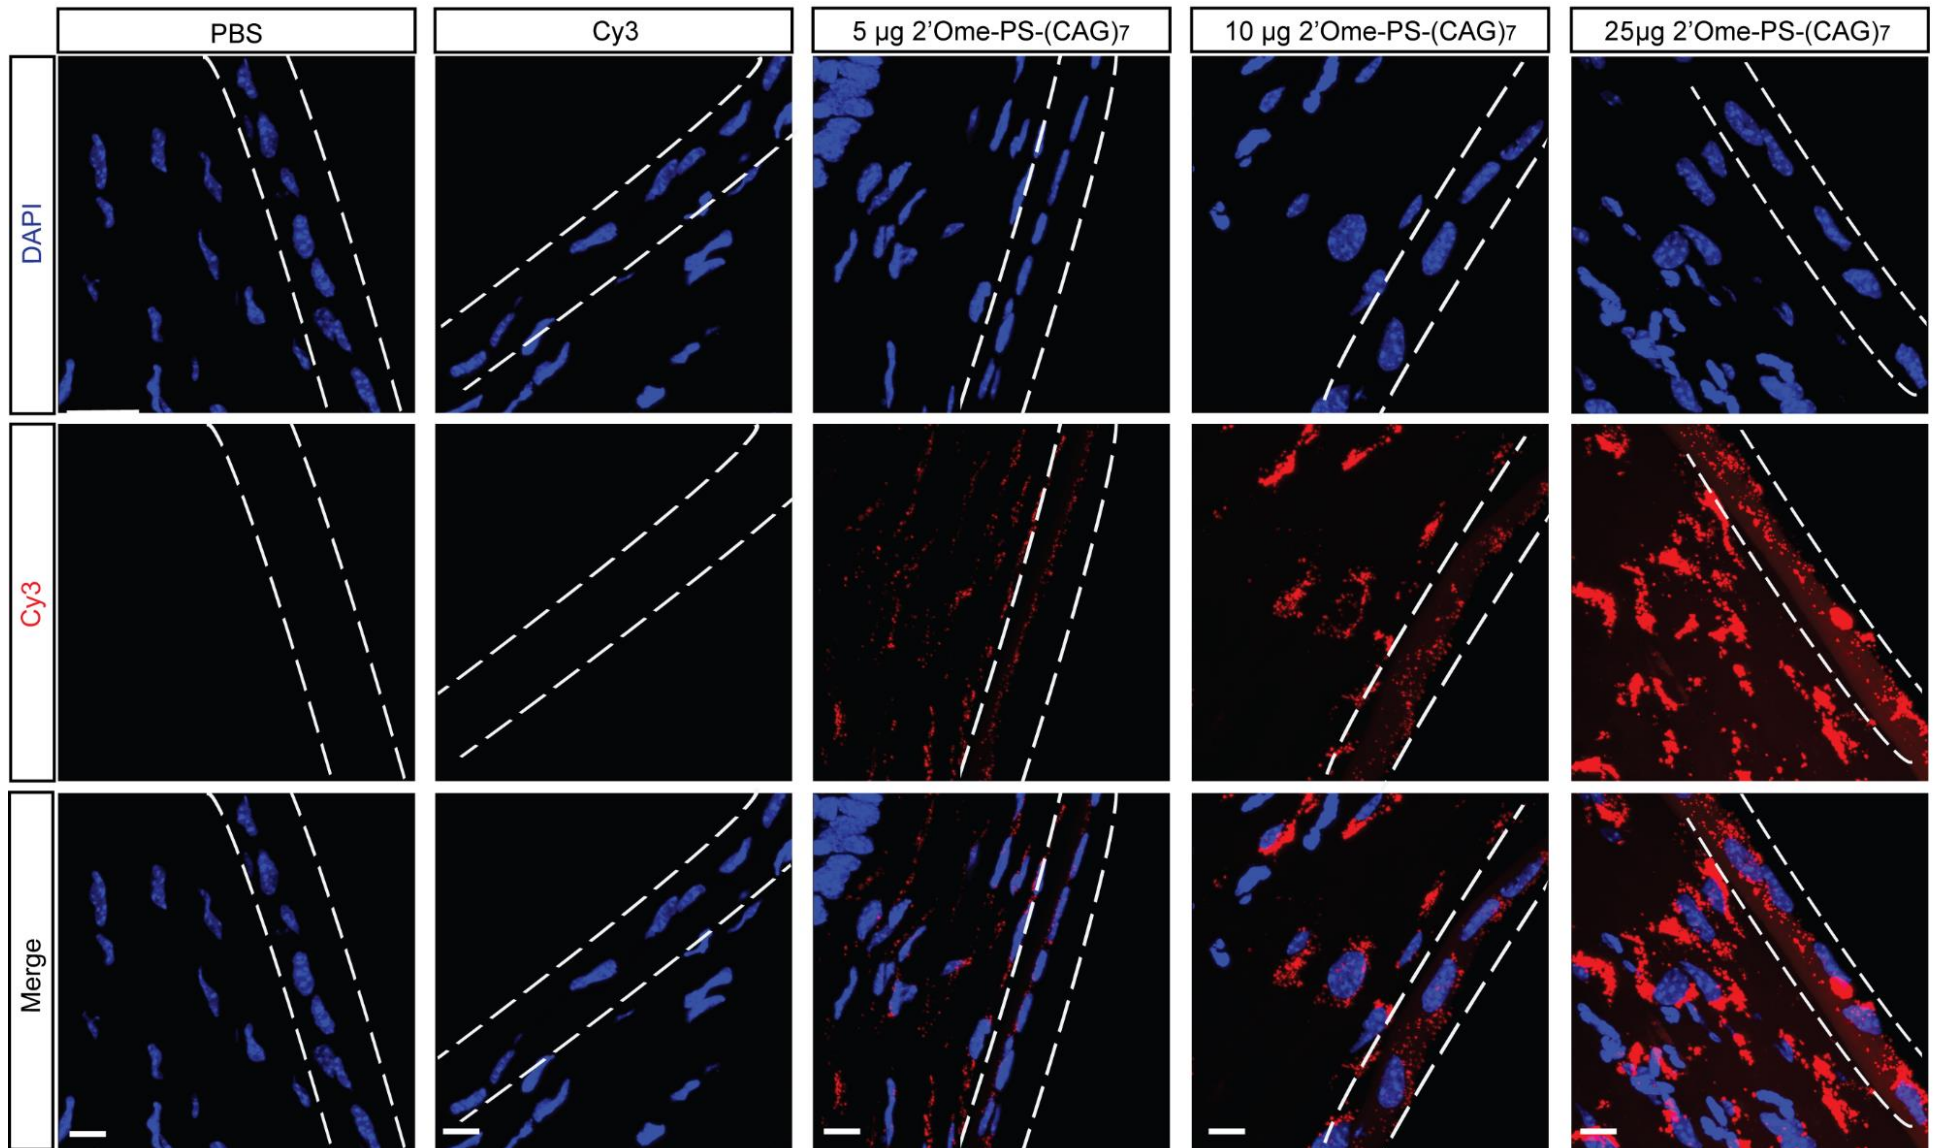

**Figure S6. Visualization of Cy3-labelled 2'Ome-PS-(CAG)<sub>7</sub> antisense oligonucleotide (ASO) in corneal tissue following intraocular administration.** C57Bl6 mice were intravitreally injected with 0.025, 0.01 or 0.005 mg of Cy-3 labelled 2'Ome-PS-(CAG)<sub>7</sub> ASO, free Cy3 dye alone (identical molar amount to the ASO), or PBS. Animals were sacrificed 48h post injection. Eyes were enucleated and immersion fixed in paraformaldehyde. Slides were prepared and immediately viewed on a confocal fluorescent microscope after counterstaining for cell nuclei detection with DAPI (blue). The location of the corneal endothelium is denoted by dashed lines. Scale bars, 20 µm.

**Table S1. Summary of antibodies used in this study.**

| Target protein | Source | Dilution | Reference                                  |
|----------------|--------|----------|--------------------------------------------|
| ZO-1           | Mouse  | 1:500    | Invitrogen                                 |
| ATP1A1         | Mouse  | 1:50     | Developmental studies Hybridoma Bank (a6F) |
| N-Cadherin     | Rabbit | 1:100    | Abcam (ab12221)                            |
| N-CAM          | Rabbit | 1:100    | Cell signaling 3606s                       |
| CD166          | Mouse  | 1:200    | Pharmingen (BD) 559260                     |
| E-Cadherin     | Rat    | 1:500    | Abcam (ab11512)                            |
| MBNL1          | Rabbit | 1:2000   | Lin et al, 2006 <sup>27</sup>              |
| MBNL2          | Mouse  | 1:100    | Santa Cruz (sc-365104)                     |

**Table S2. Primers used to detect alternative splice events by reverse transcriptase (RT)-PCR.**

| Primer         | Sequence 5'-3'         | Amplicon sizes (bp) | Optimized annealing temperature (°C) |
|----------------|------------------------|---------------------|--------------------------------------|
| <i>MBNL1_F</i> | TGACACCAATGACAACACAGTC | 383/329             | 65                                   |
| <i>MBNL1_R</i> | CTGGTGGGAGAAATGCTGTA   |                     |                                      |
| <i>MBNL2_F</i> | ACAGCACCATGATCGACACAAG | 276/222             | 64                                   |
| <i>MBNL2_R</i> | AAGGATGAAGAGCACCAGGG   |                     |                                      |
| <i>NUMA1_F</i> | TACGTGCTGATGCTGAGACC   | 305/263             | 64                                   |
| <i>NUMA1_R</i> | CTTGCTGGCTTGGTCAGAGT   |                     |                                      |



**Table S3: Fibroblast, and case matched corneal endothelial cell (CEC), lines investigated by fluorescence *in situ* hybridization (FISH). NA, not available. NI, not investigated. CTG18.1 repeat lengths were confirmed to be concordant between blood and fibroblast-derived gDNA samples.**

| <b>Fibroblast line</b> | <b>Case matched CEC line</b> | <b>CTG18.1 genotype</b> | <b>CUG RNA foci detected in fibroblasts?</b> | <b>CUG RNA foci detected in CECs?</b> |
|------------------------|------------------------------|-------------------------|----------------------------------------------|---------------------------------------|
| #F1                    | NA                           | 31/69                   | No                                           | NI                                    |
| #F2                    | NA                           | 12/53                   | No                                           | NI                                    |
| #F3                    | NA                           | 84/108                  | No                                           | NI                                    |
| #F4                    | #43                          | 23/68                   | No                                           | Yes                                   |
| #F5                    | #47                          | 23/70                   | No                                           | Yes                                   |
| #F6                    | #31                          | 12/77                   | No                                           | Yes                                   |

**Table S4: CTG18.1 genotype of FECD case-derived corneal endothelial cell (CEC) lines investigated by fluorescence *in situ* hybridization (FISH).** Cell lines are ordered based on CTG18.1 genotype status in ascending order. Genotypes were generated using case matched whole blood-derived genomic DNA samples.

| CEC line | CTG18.1 genotype | CUG RNA foci detected? |
|----------|------------------|------------------------|
| #94      | 12/12            | No                     |
| #139     | 12/12            | No                     |
| #42      | 12/15            | No                     |
| #86      | 12/15            | No                     |
| #32      | 12/16            | No                     |
| #46      | 26/27            | No                     |
| #190     | 15/16            | No                     |
| #211     | 12/23            | No                     |
| #61      | 18/31            | No                     |
| #181     | 25/31            | Yes                    |
| #50      | 12/53            | Yes                    |
| #136     | 12/58            | Yes                    |
| #8       | 16/62            | Yes                    |
| #38      | 16/62            | Yes                    |
| #152     | 15/68            | Yes                    |
| #43      | 23/68            | Yes                    |
| #33      | 16/70            | Yes                    |
| #47      | 23/70            | Yes                    |
| #120     | 23/70            | Yes                    |
| #70      | 12/74            | Yes                    |
| #49      | 12/76            | Yes                    |
| #192     | 25/76            | Yes                    |
| #31      | 12/77            | Yes                    |
| #193     | 25/79            | Yes                    |
| #25      | 24/80            | Yes                    |
| #29      | 16/81            | Yes                    |
| #37      | 12/82            | Yes                    |
| #92      | 12/84            | Yes                    |
| #88      | 18/84            | Yes                    |
| #115     | 18/84            | Yes                    |
| #34      | 12/87            | Yes                    |
| #137     | 16/88            | Yes                    |
| #63      | 12/97            | Yes                    |
| #67      | 12/98            | Yes                    |
| #121     | 12/100           | Yes                    |
| #44      | 12/126           | Yes                    |

**Table S5: FECD case-derived corneal endothelial cell (CEC) lines used for dual fluorescence *in situ* hybridization (FISH) and immunocytochemistry (ICC) experiments.** NI, not investigated, E, expanded, NE, non-expanded.

| Case derived CEC line | CTG18.1 genotype | CTG18.1 Genotype Classification | CUG RNA foci detected? | MBNL1 sequestered? | MBNL2 sequestered? |
|-----------------------|------------------|---------------------------------|------------------------|--------------------|--------------------|
| #121                  | 12/100           | E                               | Yes                    | Yes                | NI                 |
| #190                  | 15/16            | NE                              | No                     | No                 | NI                 |
| #192                  | 25/76            | E                               | Yes                    | Yes                | NI                 |
| #193                  | 25/79            | E                               | Yes                    | Yes                | NI                 |
| #204                  | 12/99            | E                               | Yes                    | NI                 | Yes                |
| #206                  | 25/76            | E                               | Yes                    | NI                 | Yes                |
| #211                  | 12/23            | NE                              | No                     | NI                 | No                 |
| #226                  | 12/18            | NE                              | No                     | No                 | NI                 |

**Table S6: FECD case-derived corneal endothelial cell (CEC) lines used for transcriptomic analysis.** E, expanded, NE, non-expanded.

| Case matched CEC line | CTG18.1 genotype | CTG18.1 Genotype Classification |
|-----------------------|------------------|---------------------------------|
| #138                  | 16/84            | E                               |
| #140                  | 12/106           | E                               |
| #149                  | 16/93            | E                               |
| #154                  | 12/81            | E                               |
| #125                  | 13/18            | NE                              |
| #141                  | 18/24            | NE                              |
| #145                  | 22/28            | NE                              |

**Table S7: FECD case-derived corneal endothelial cell (CEC) lines used for antisense oligonucleotide (ASO) treatment experiments. E, expanded.**

| <b>Case matched CEC line</b> | <b>CTG18.1 genotype</b> | <b>CTG18.1 Genotype Classification</b> |
|------------------------------|-------------------------|----------------------------------------|
| #88                          | 18/84                   | E                                      |
| #92                          | 12/84                   | E                                      |
| #115                         | 18/84                   | E                                      |
| #121                         | 12/100                  | E                                      |
| #50                          | 12/53                   | E                                      |
| #63                          | 12/97                   | E                                      |

**Table S8: FECD case-derived corneal endothelial cell (CEC) lines used to assess MBNL1 localization, following antisense oligonucleotide (ASO) treatment. E, expanded.**

| <b>Case matched CEC line</b> | <b>CTG18.1 genotype</b> | <b>CTG18.1 Genotype Classification</b> |
|------------------------------|-------------------------|----------------------------------------|
| #202                         | 12/96                   | E                                      |
| #208                         | 24/107                  | E                                      |
| #212                         | 12/93                   | E                                      |
| #218                         | 15/92                   | E                                      |

**Table S9: FECD case-derived corneal endothelial cell (CEC) lines used for transcriptomic analysis, following antisense oligonucleotide (ASO) treatment. E, expanded.**

| <b>Case matched CEC line</b> | <b>CTG18.1 genotype</b> | <b>CTG18.1 Genotype Classification</b> |
|------------------------------|-------------------------|----------------------------------------|
| #162                         | 71/113                  | E                                      |
| #173                         | 16/72                   | E                                      |
| #179                         | 15/61                   | E                                      |
| #210                         | 14/80                   | E                                      |
| #215                         | 12/73                   | E                                      |
| #216                         | 18/91                   | E                                      |
| #219                         | 18/88                   | E                                      |
| #220                         | 15/103                  | E                                      |
| #223                         | 12/63                   | E                                      |
| #224                         | 12/89                   | E                                      |
